# Supplementary material
Source: Springer Nature journal article supplement (https://www.springermedizin.de/resource/supplementary/12985_2010_982_MOESM2_ESM.pdf/9608878)

0 hr

2 hr

4 hr

8 hr

HDAC4

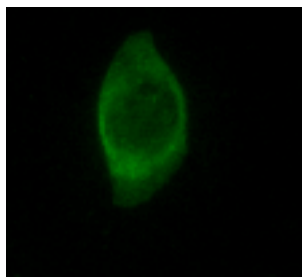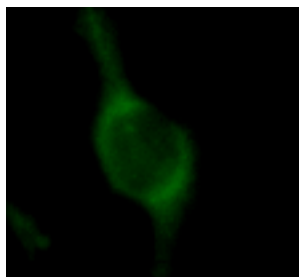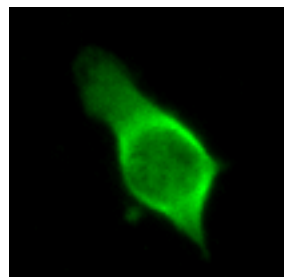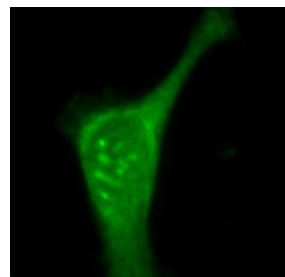

DAPI

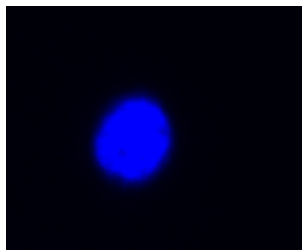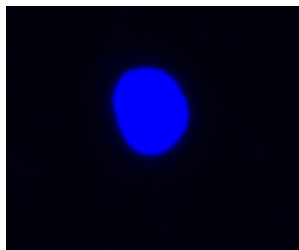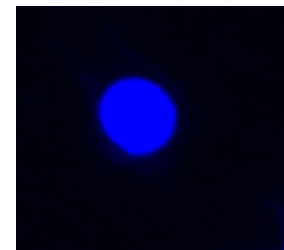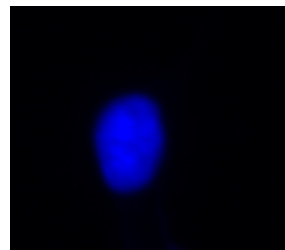

DIC

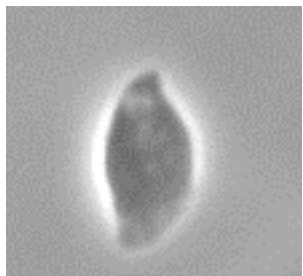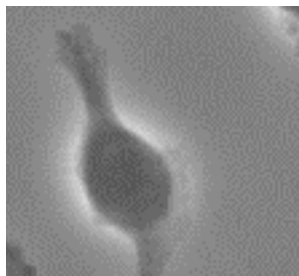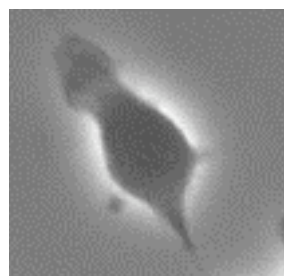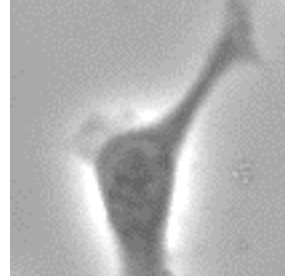

Supplement: MOESM2 [file 9608878]
